# Supplementary material
Source: PubMed Central journal article supplement (PMC4583660)

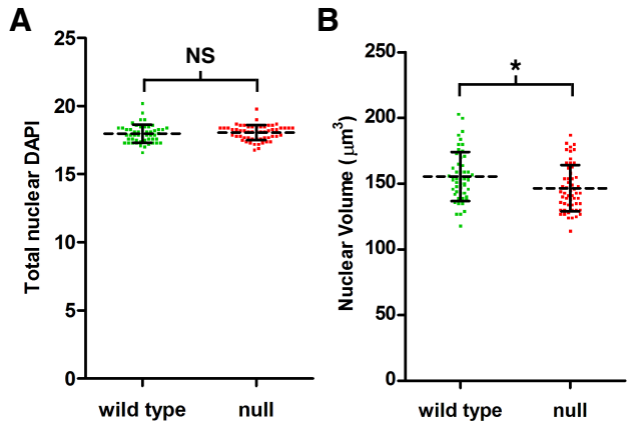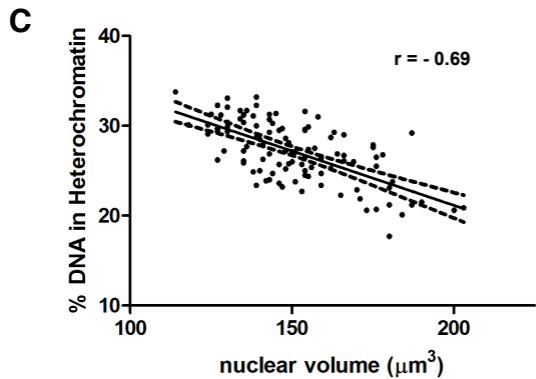

Supplement: NIHMS721045-supplement-1.pdf [file NIHMS721045-supplement-1.pdf]

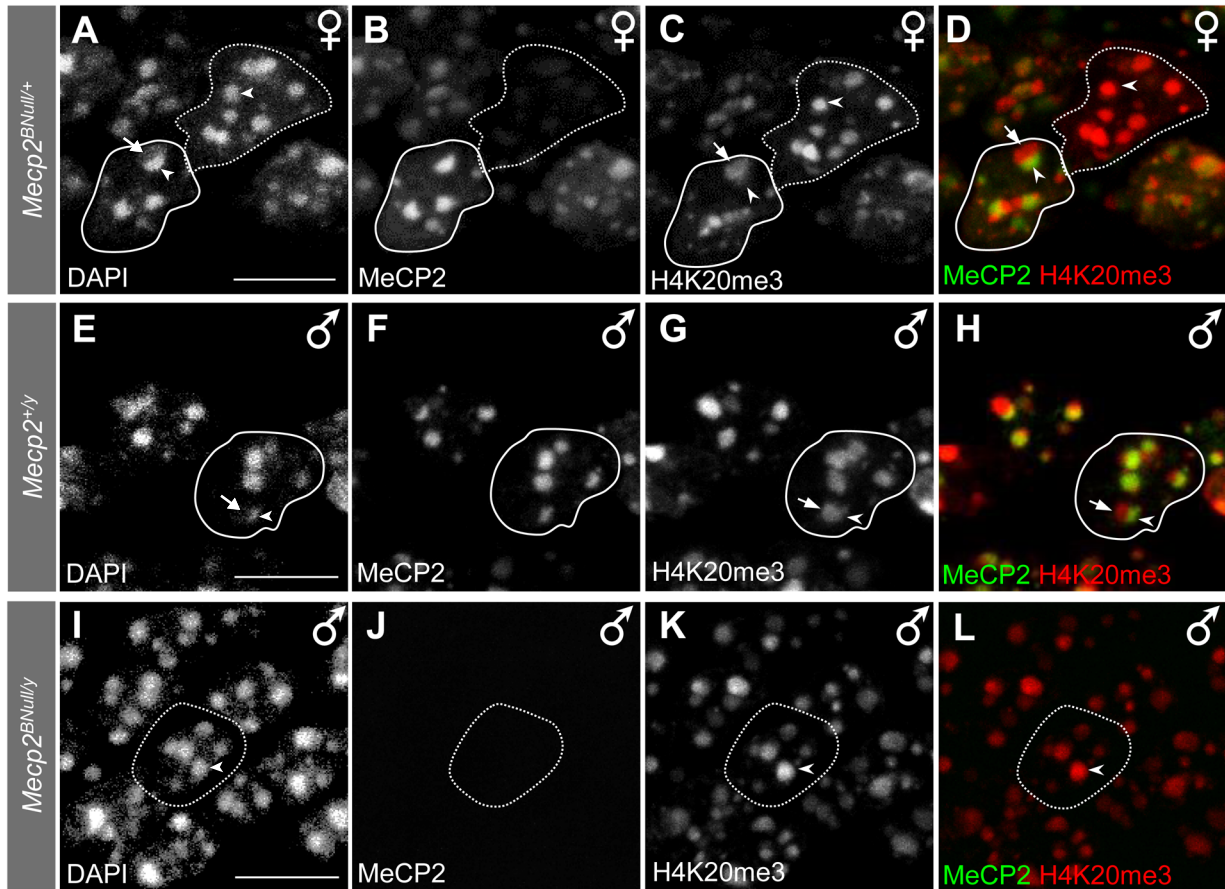

Supplement: NIHMS721045-supplement-2.pdf [file NIHMS721045-supplement-2.pdf]

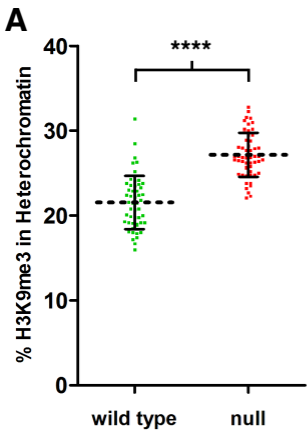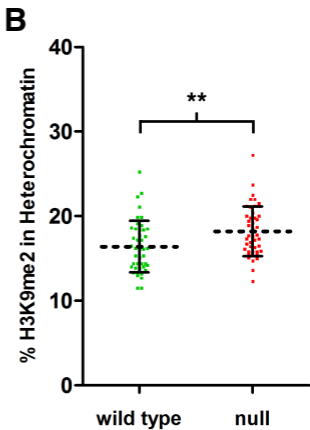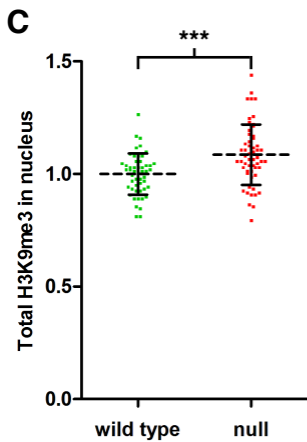

Supplement: NIHMS721045-supplement-3.pdf [file NIHMS721045-supplement-3.pdf]

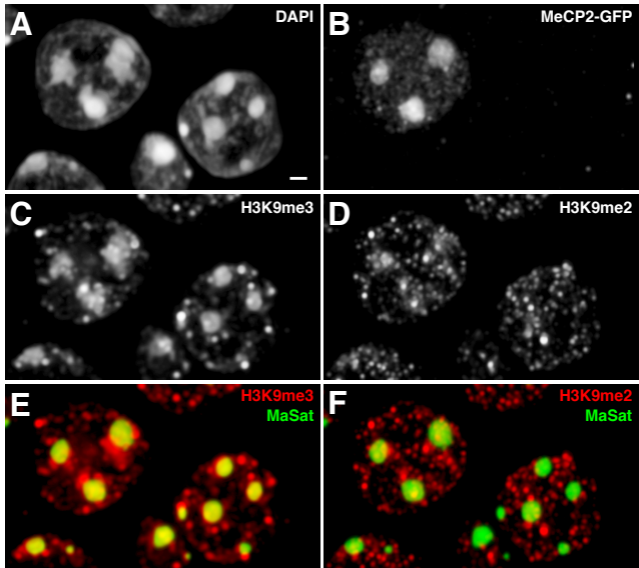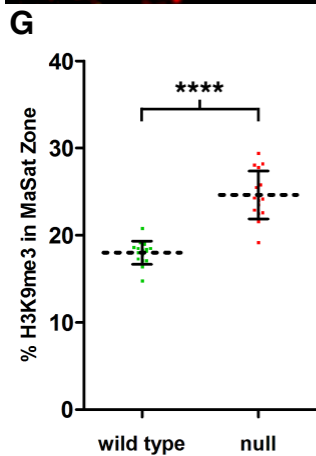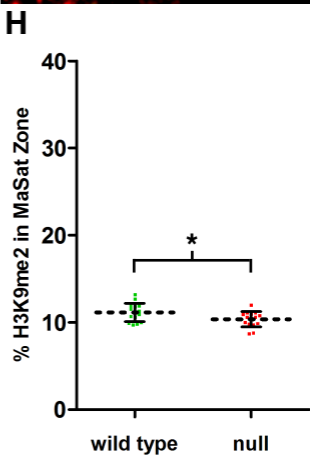

Supplement: NIHMS721045-supplement-4.pdf [file NIHMS721045-supplement-4.pdf]

**A**

wild type

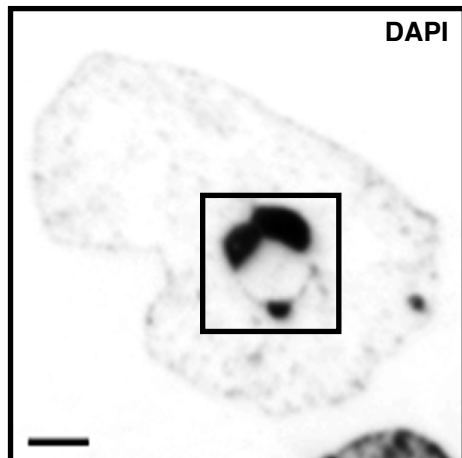

null

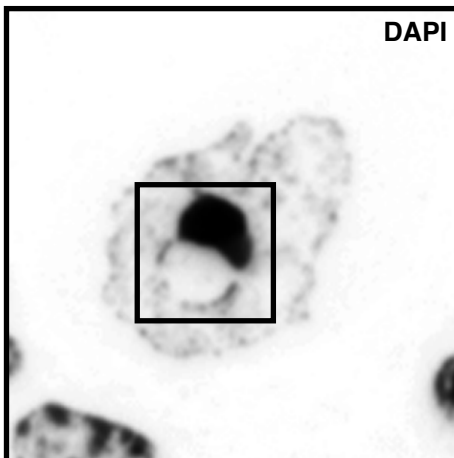**B**

wild type

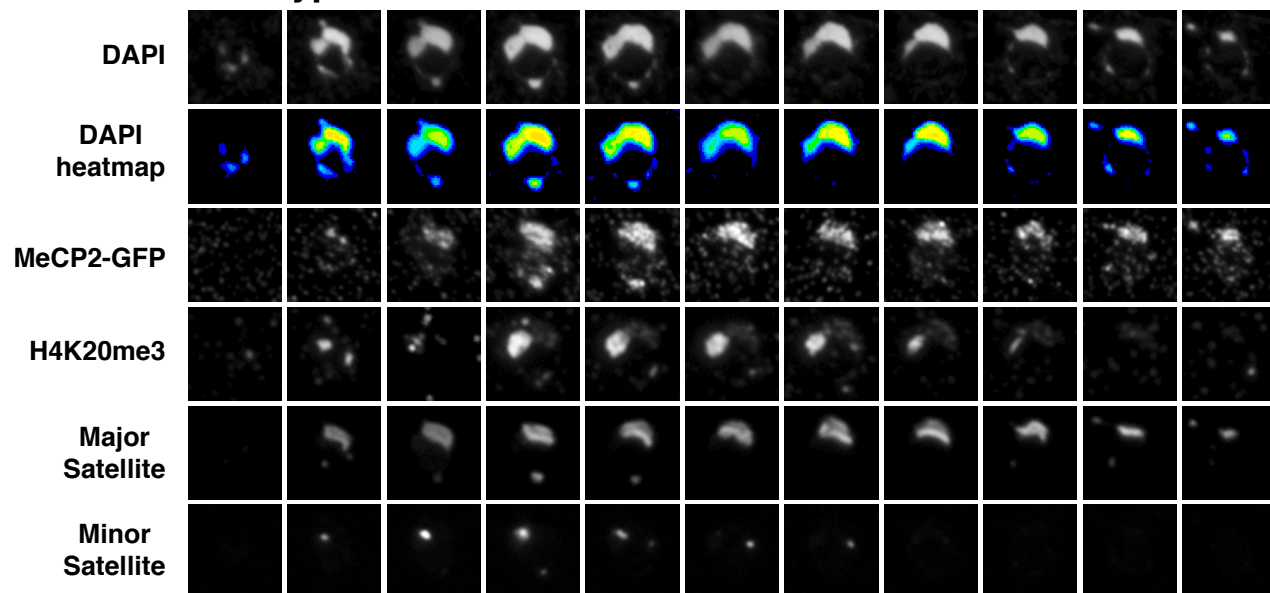**C**

null

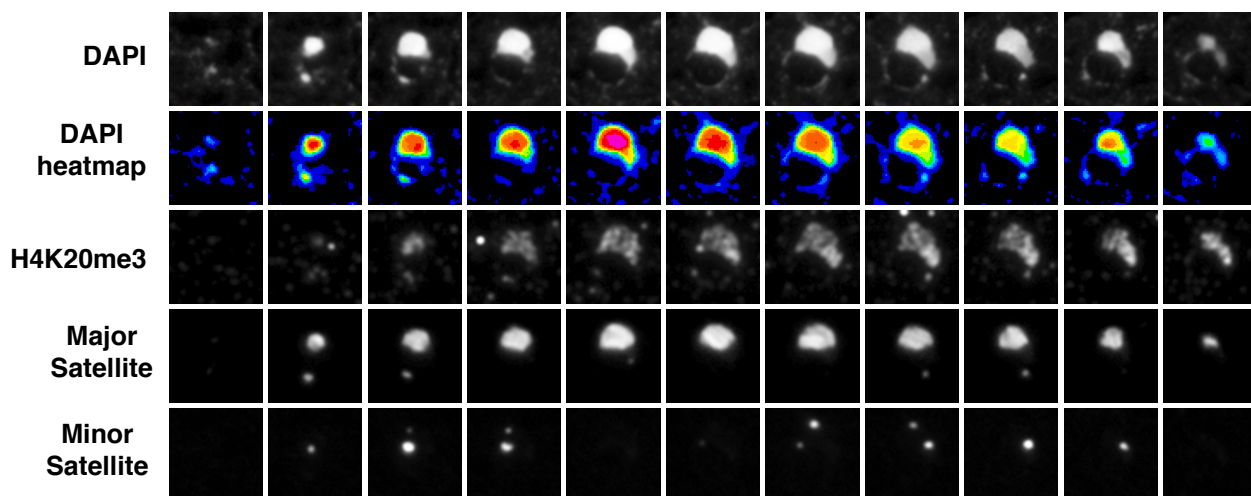

Supplement: NIHMS721045-supplement-5.pdf [file NIHMS721045-supplement-5.pdf]
